# Supplementary material for: Relationships Linking the Colour and Elemental Concentrations of Blossom Honeys with Their Antioxidant Activity: A Chemometric Approach
Source: MDPI journal article supplement (doi:10.3390/agriculture11080702), 2021-07-26
Supplement: s1 [file s1]

**Table S1.** Eigenvalues and the proportion of variation (%) explained by the principal components

| Component | Eigenvalue | Proportion | Cumulative |
|-----------|------------|------------|------------|
| 1         | 3.26       | 46.58      | 46.56      |
| 2         | 2.84       | 40.53      | 87.12      |
| 3         | 0.51       | 7.36       | 94.47      |
| 4         | 0.23       | 3.25       | 97.73      |
| 5         | 0.13       | 1.80       | 99.53      |
| 6         | 0.03       | 0.44       | 99.98      |
| 7         | 0.00       | 0.02       | 100.00     |

**Table S2.** Eigenvalues and the proportion of variation (%) explained by the principal components

| Component | Eigenvalue | Proportion | Cumulative |
|-----------|------------|------------|------------|
| 1         | 3.66       | 40.65      | 40.65      |
| 2         | 1.64       | 18.24      | 58.89      |
| 3         | 1.31       | 14.57      | 73.46      |
| 4         | 0.85       | 9.49       | 82.95      |
| 5         | 0.60       | 6.73       | 89.67      |
| 6         | 0.39       | 4.29       | 93.97      |
| 7         | 0.28       | 3.11       | 97.08      |
| 8         | 0.18       | 2.04       | 99.12      |
| 9         | 0.08       | 0.88       | 100.00     |
